# Supplementary figures and images for: Synthesis of Gd(III)-C-palmitamidomethyl-C′-DOTAMA-C6-o-carborane: a new dual agent for innovative MRI/BNCT applications
Source: Royal Society of Chemistry journal article supplement (doi:10.1039/b808804g), 2008-01-01

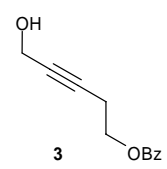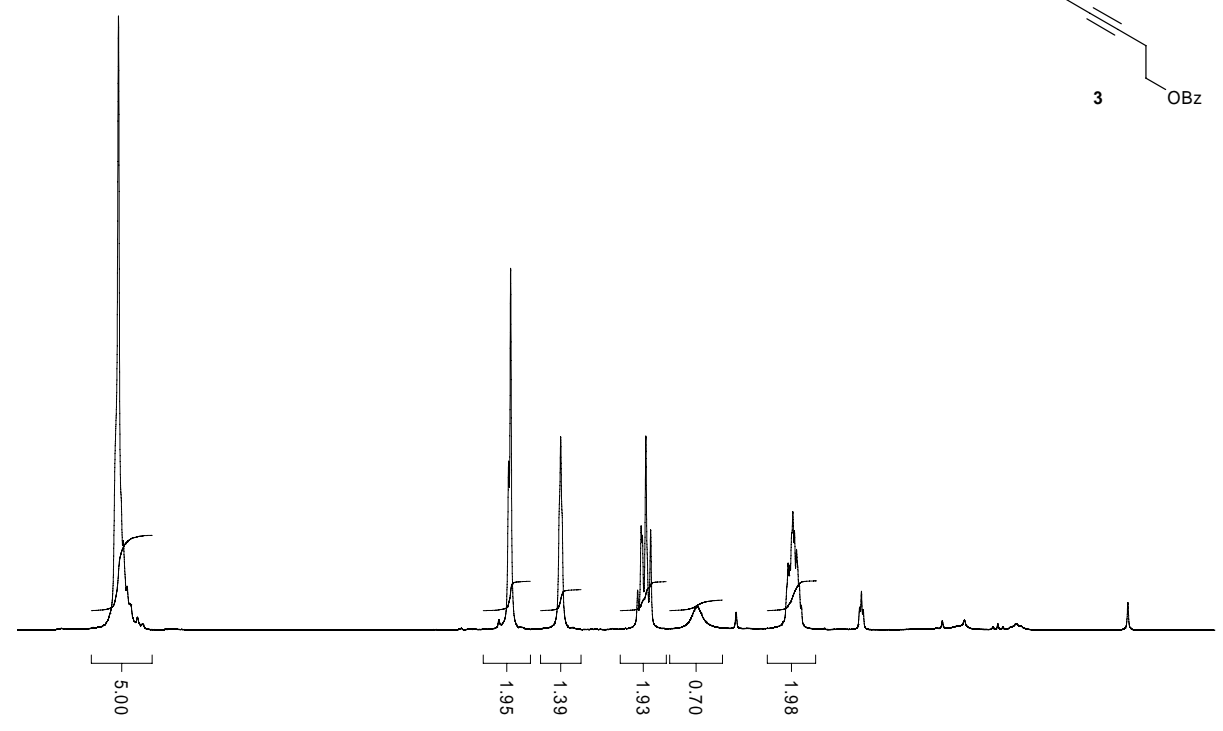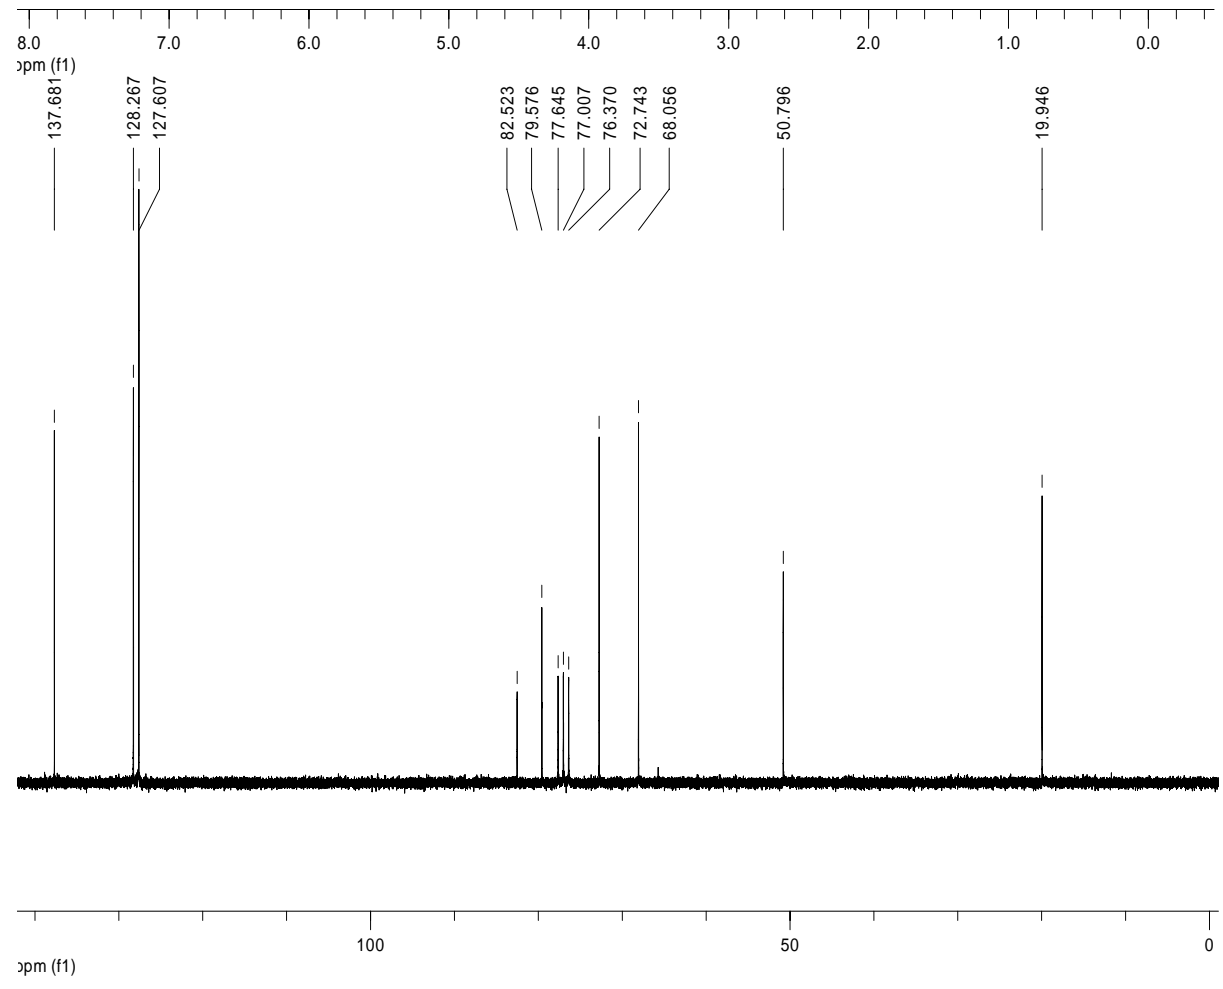

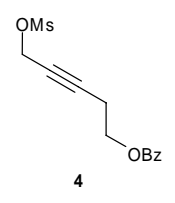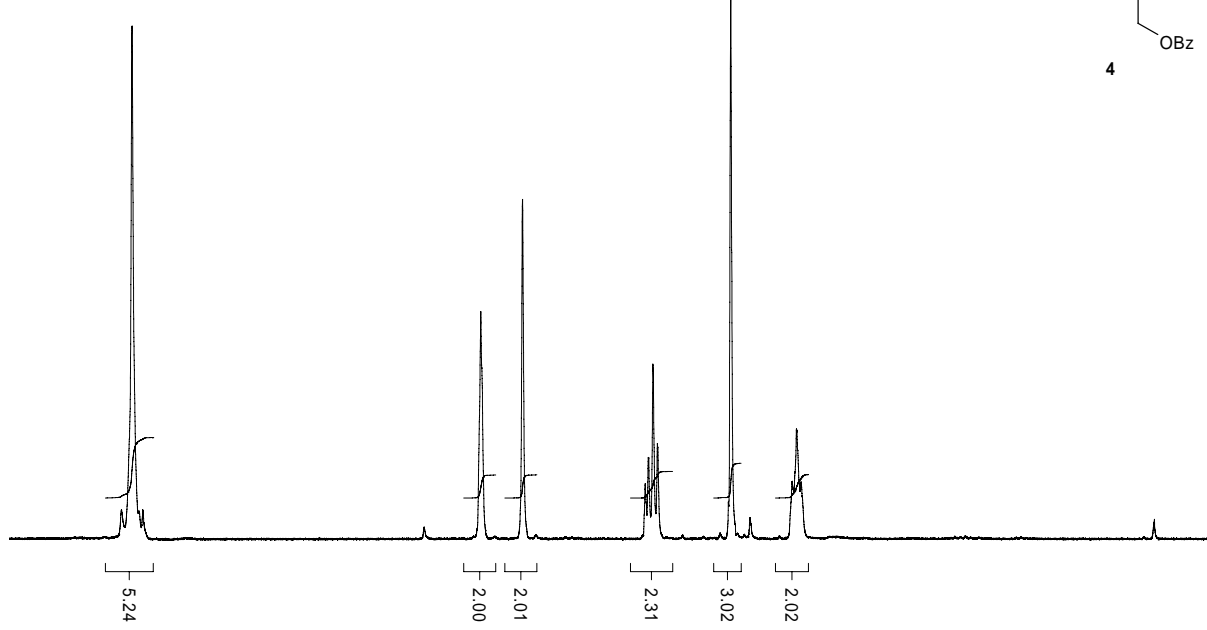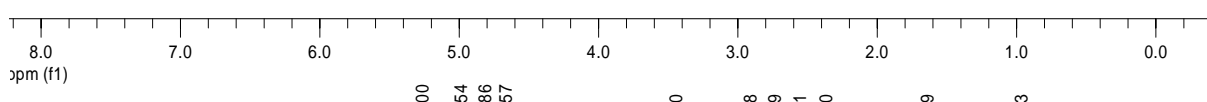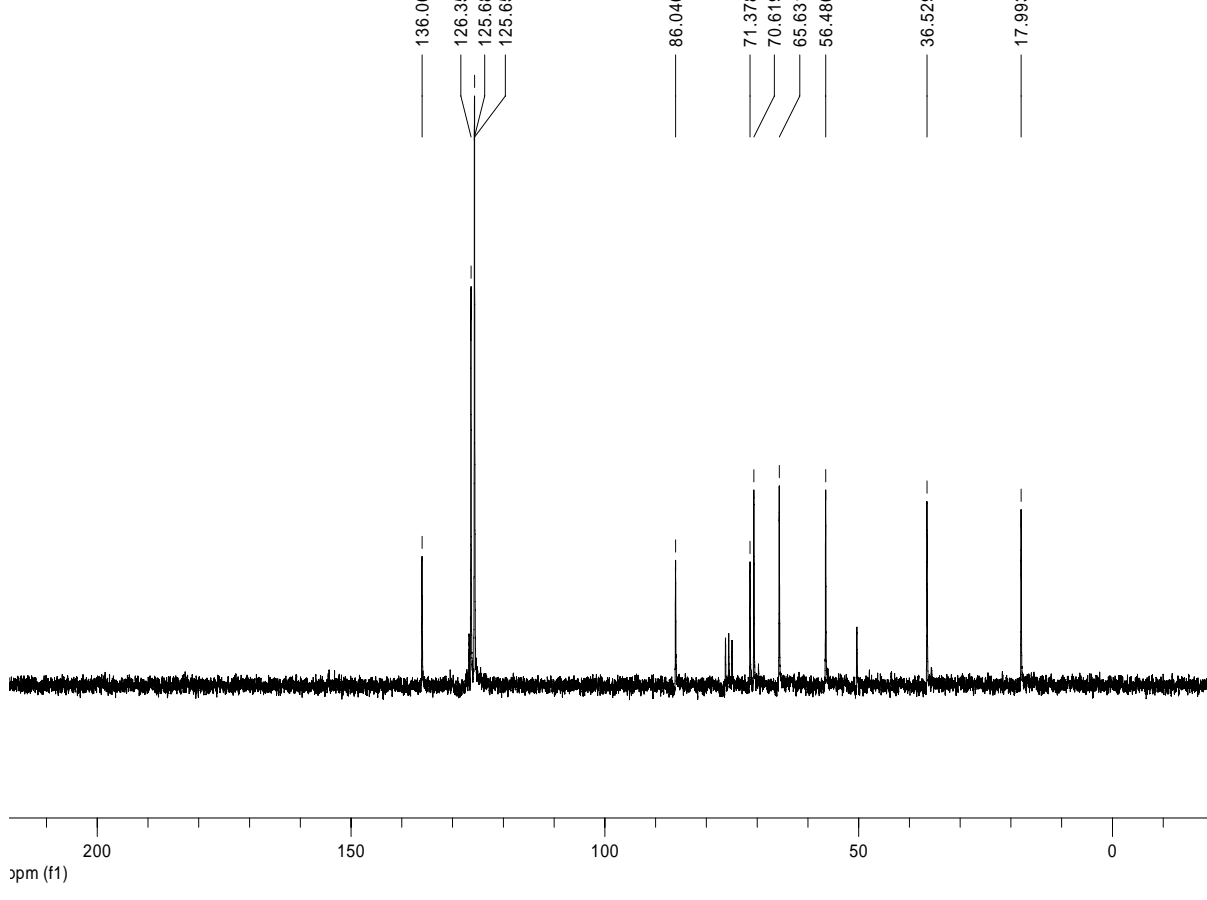

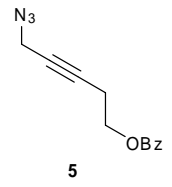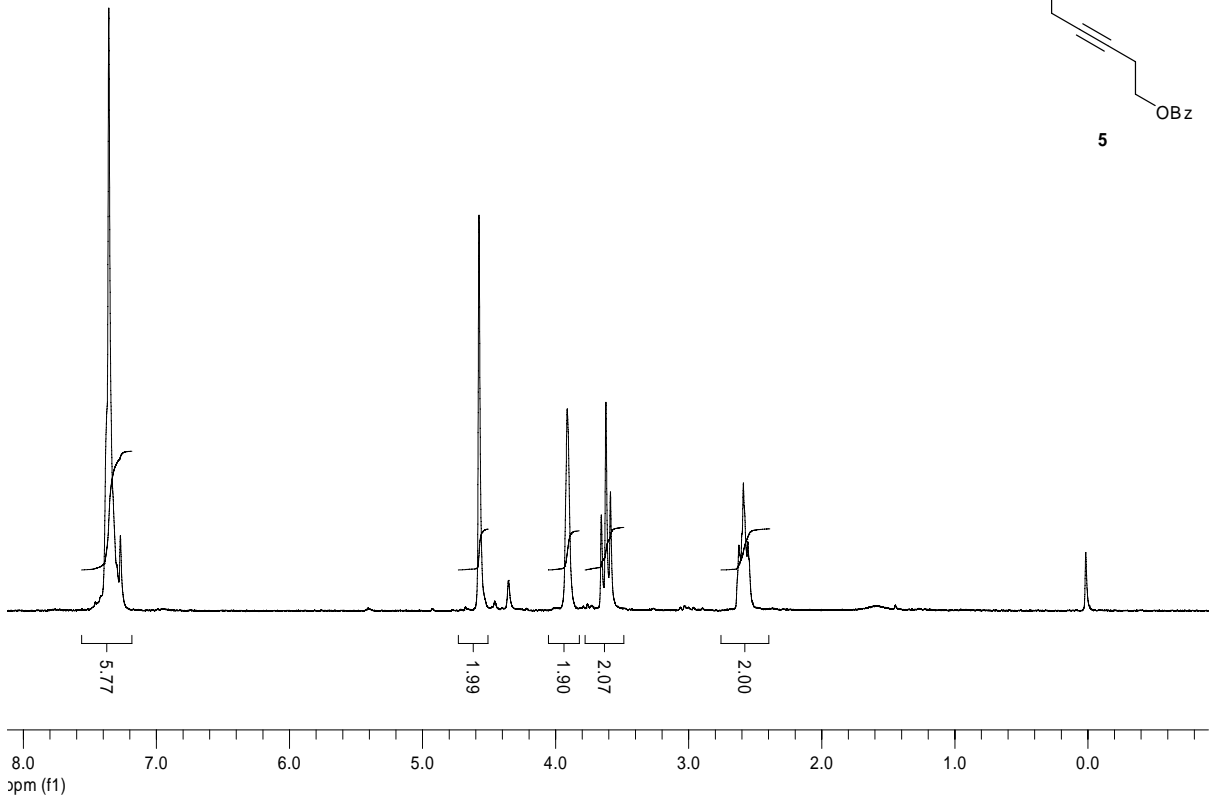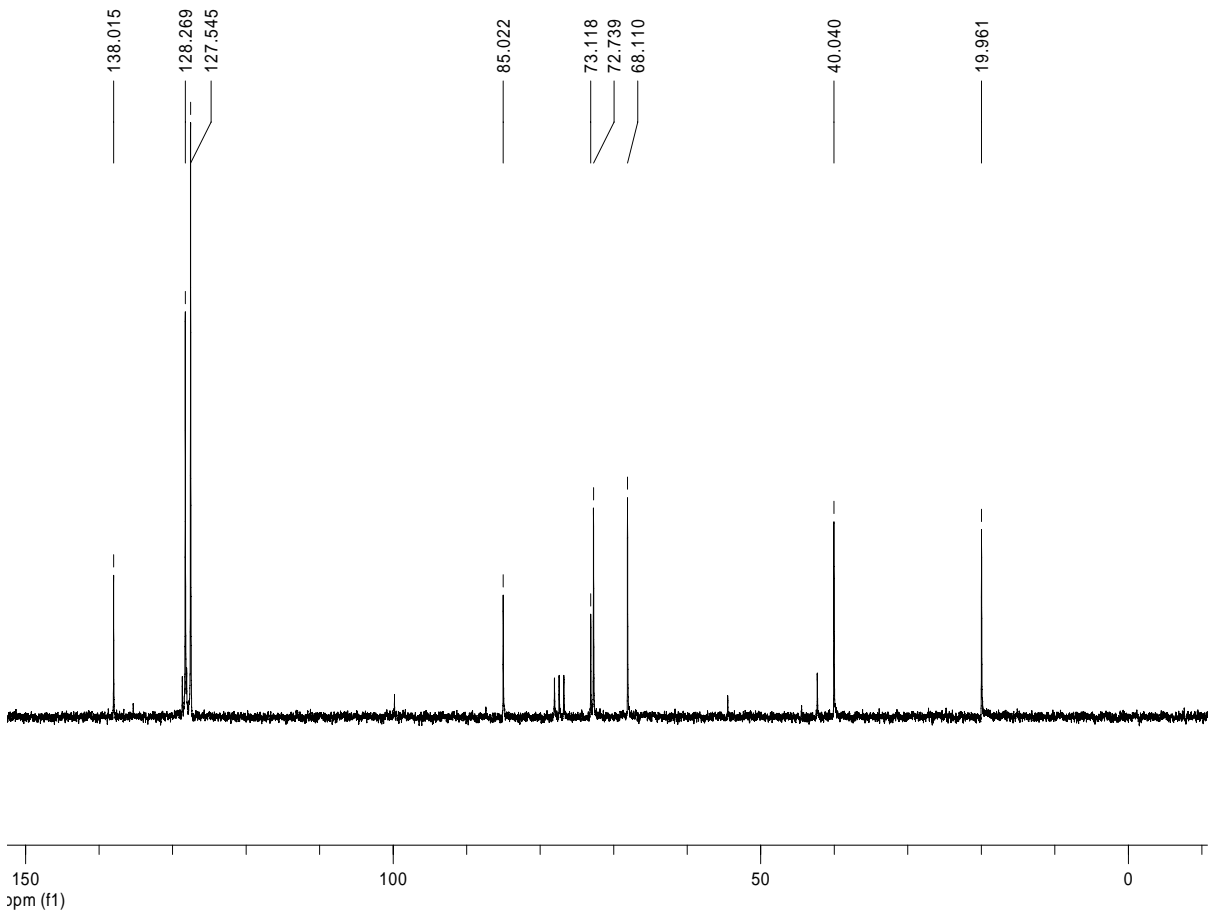

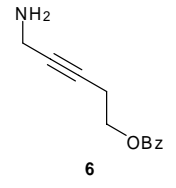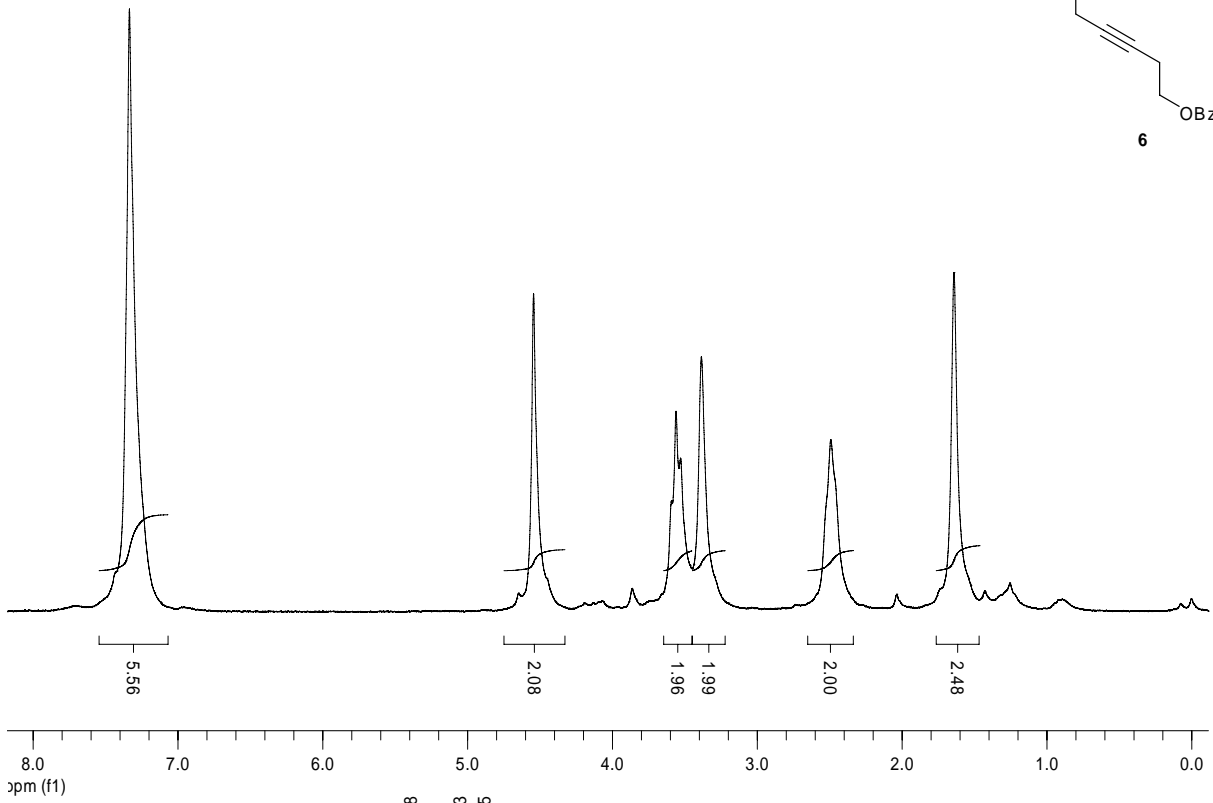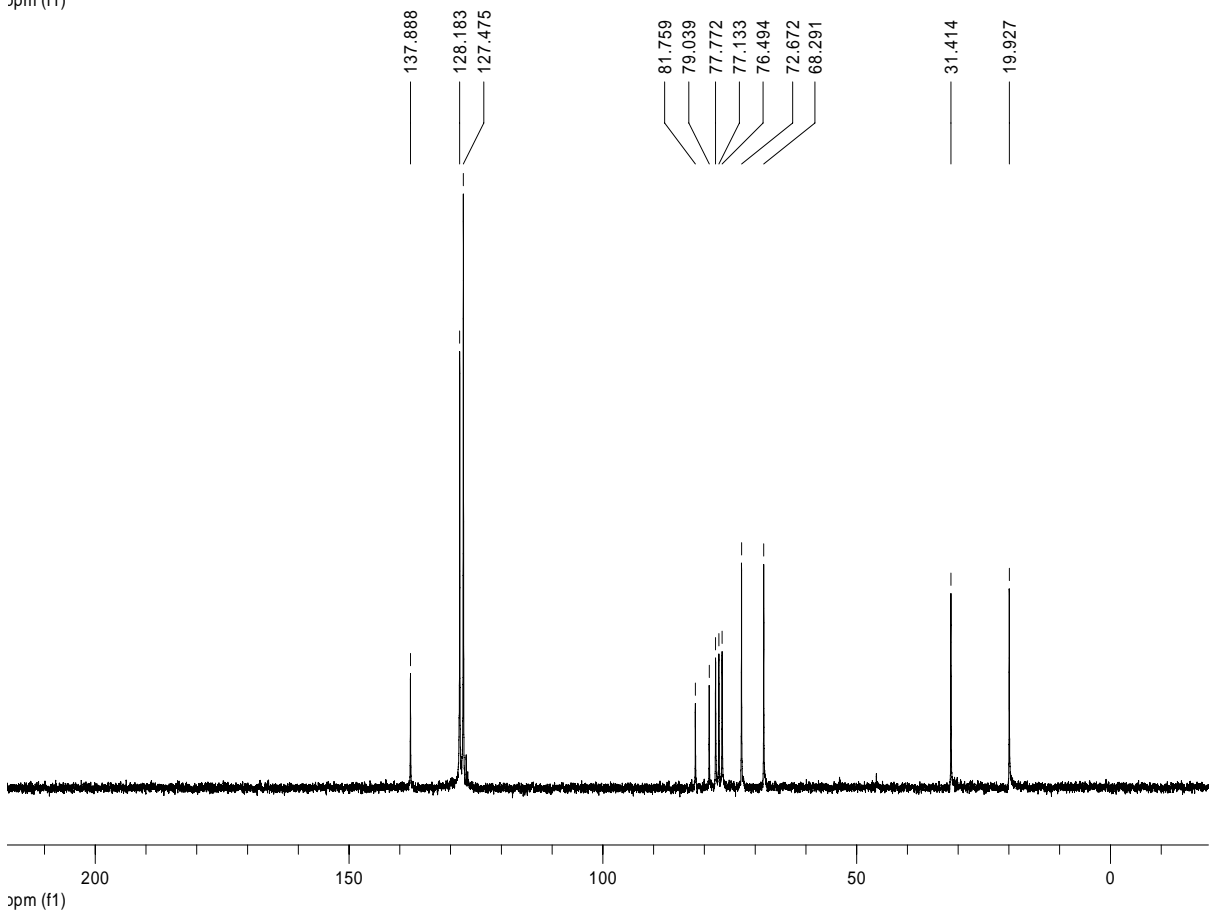

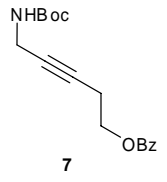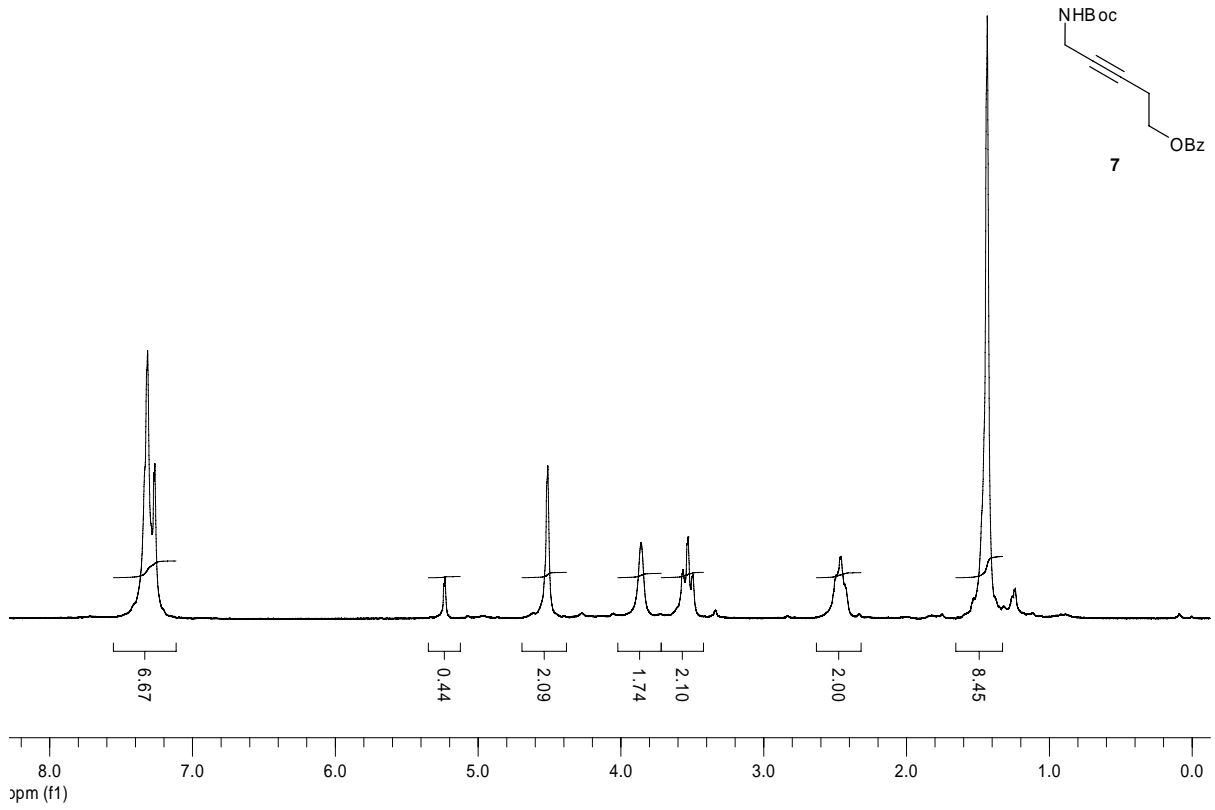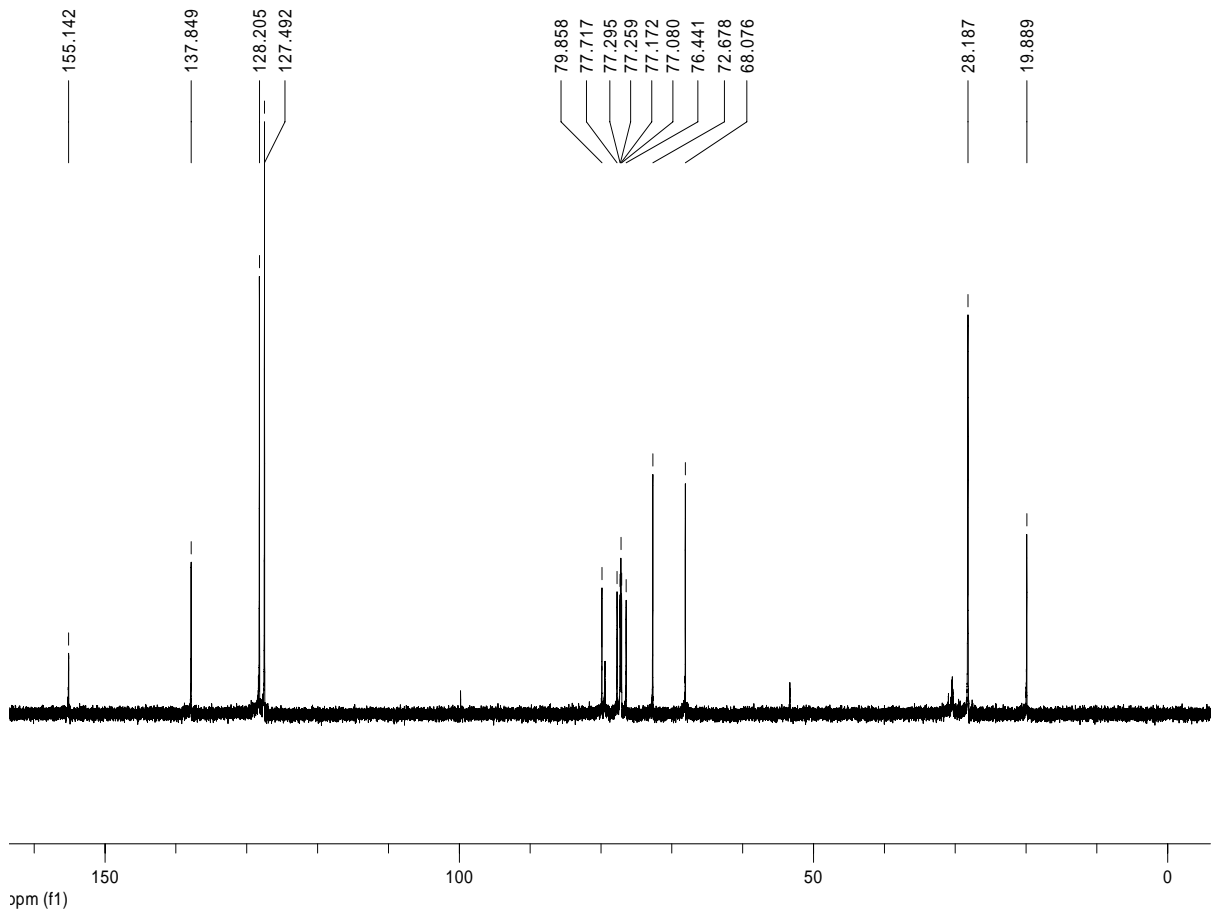

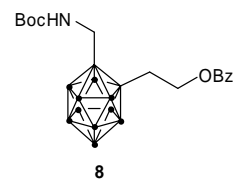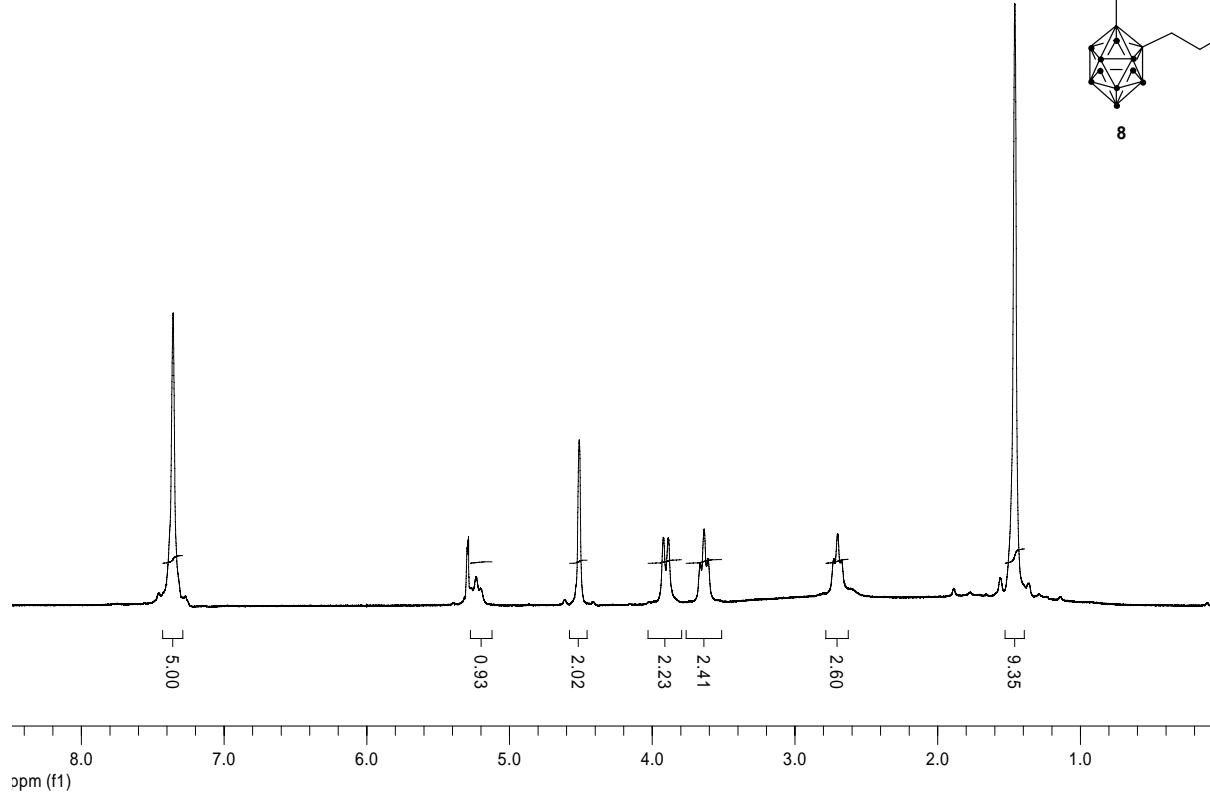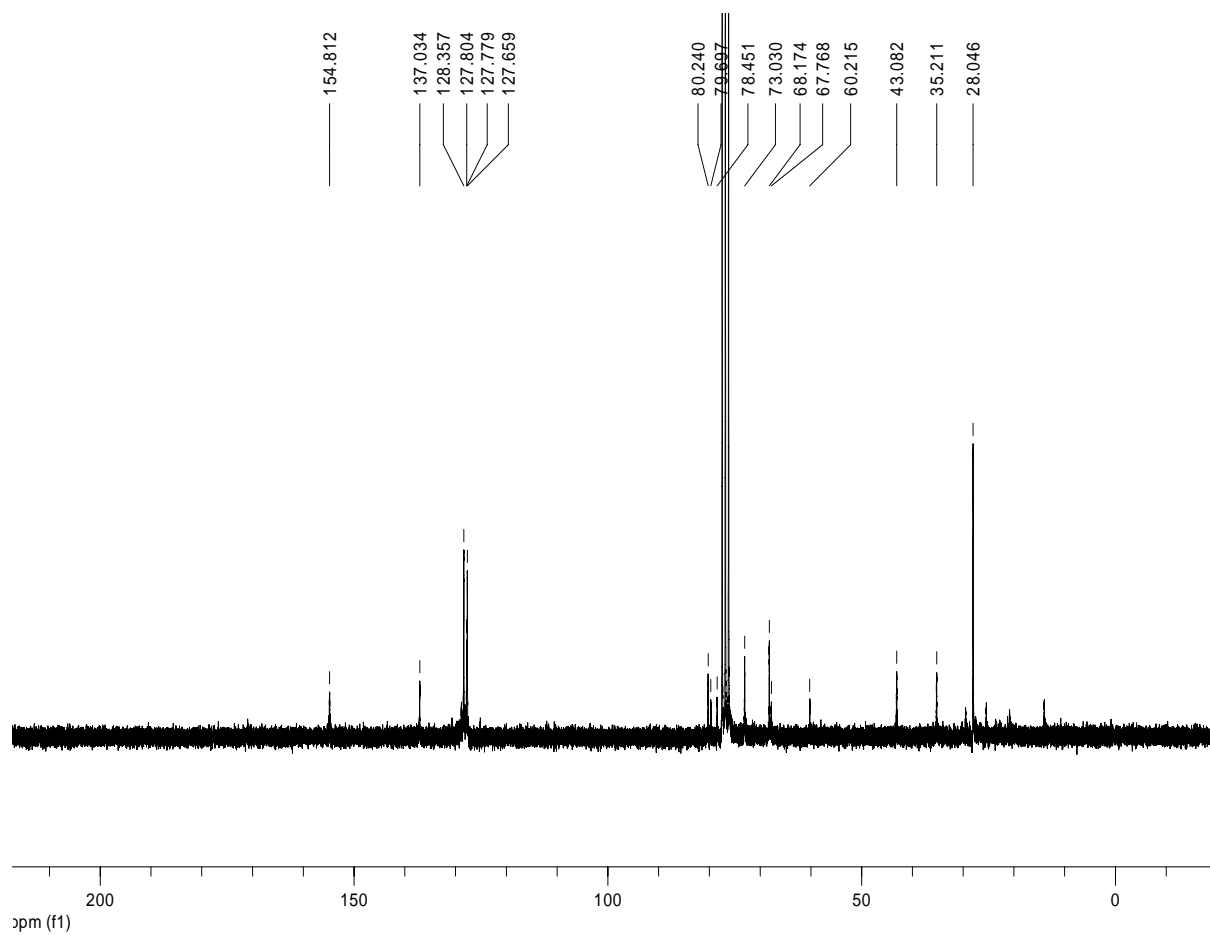

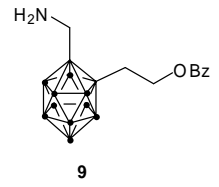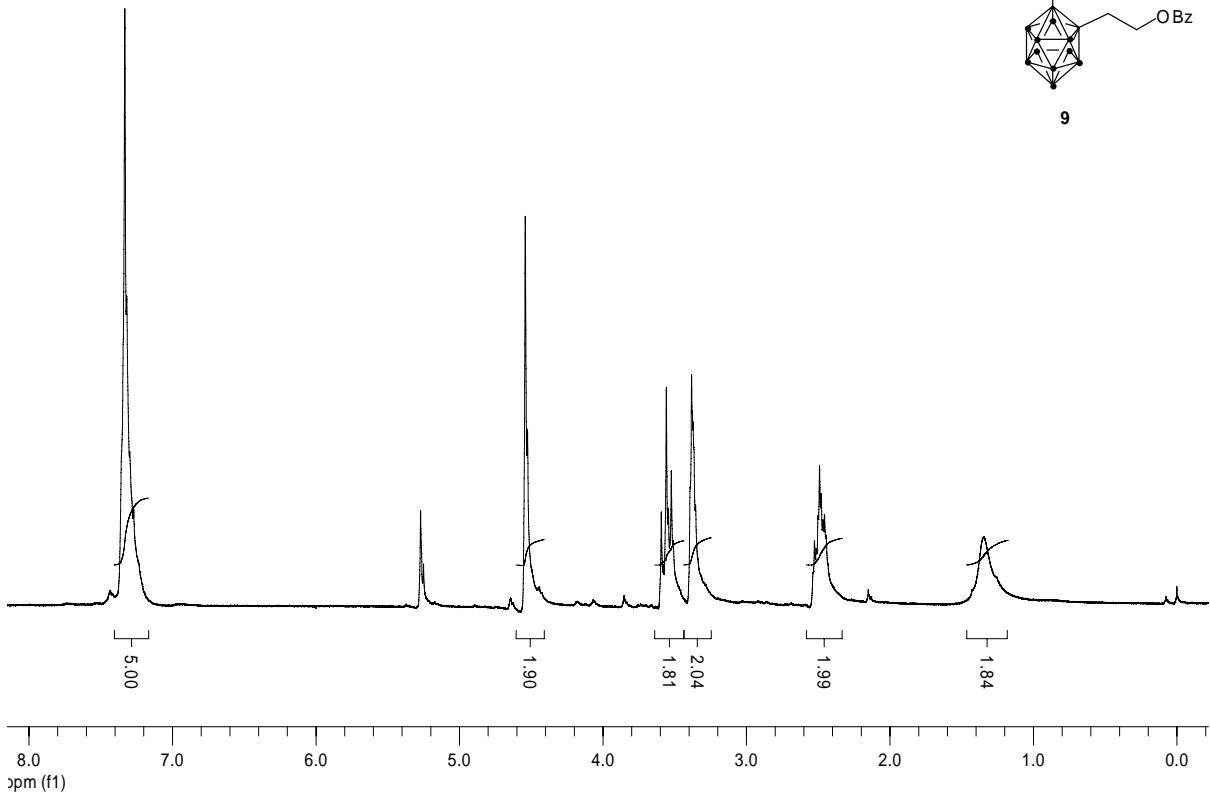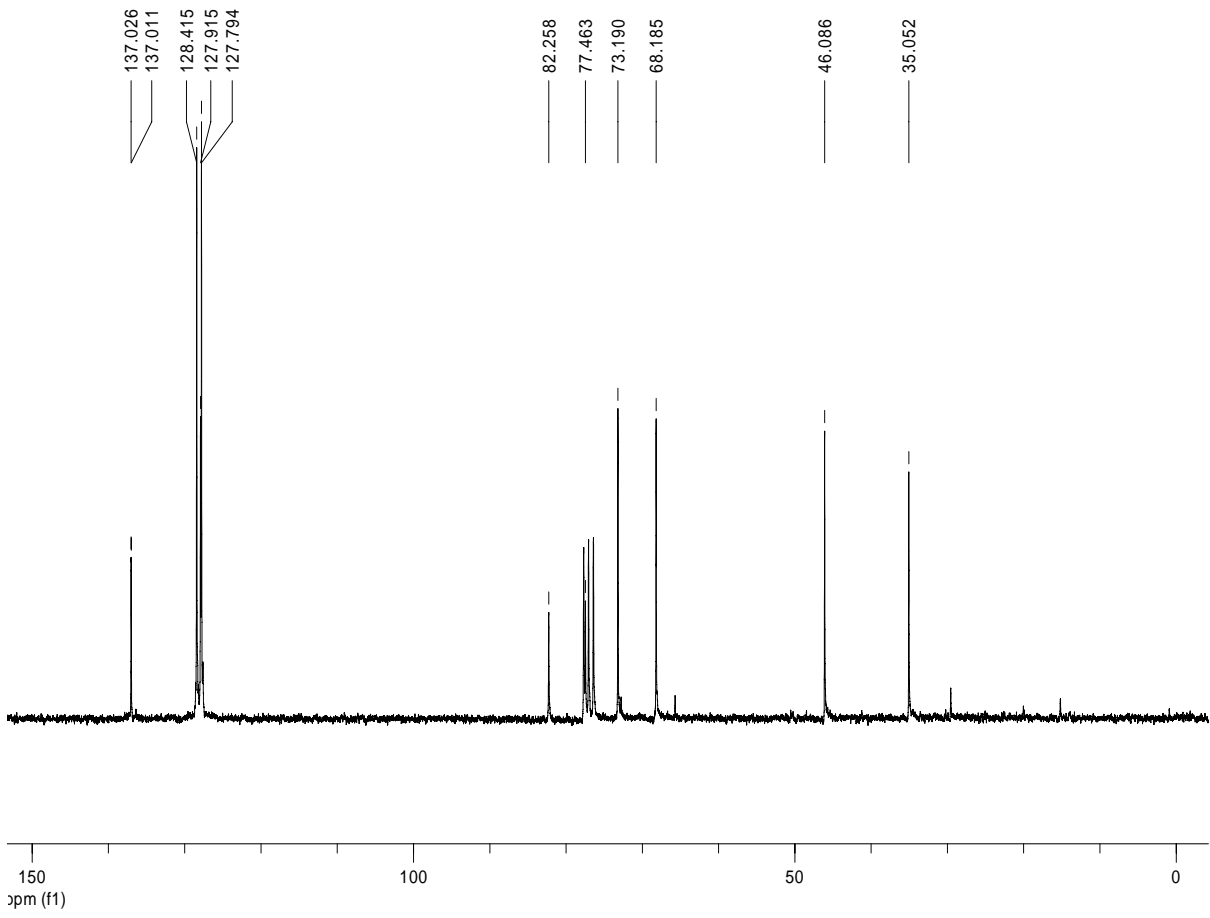

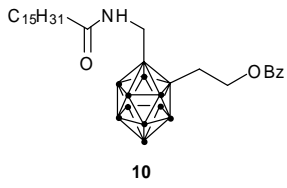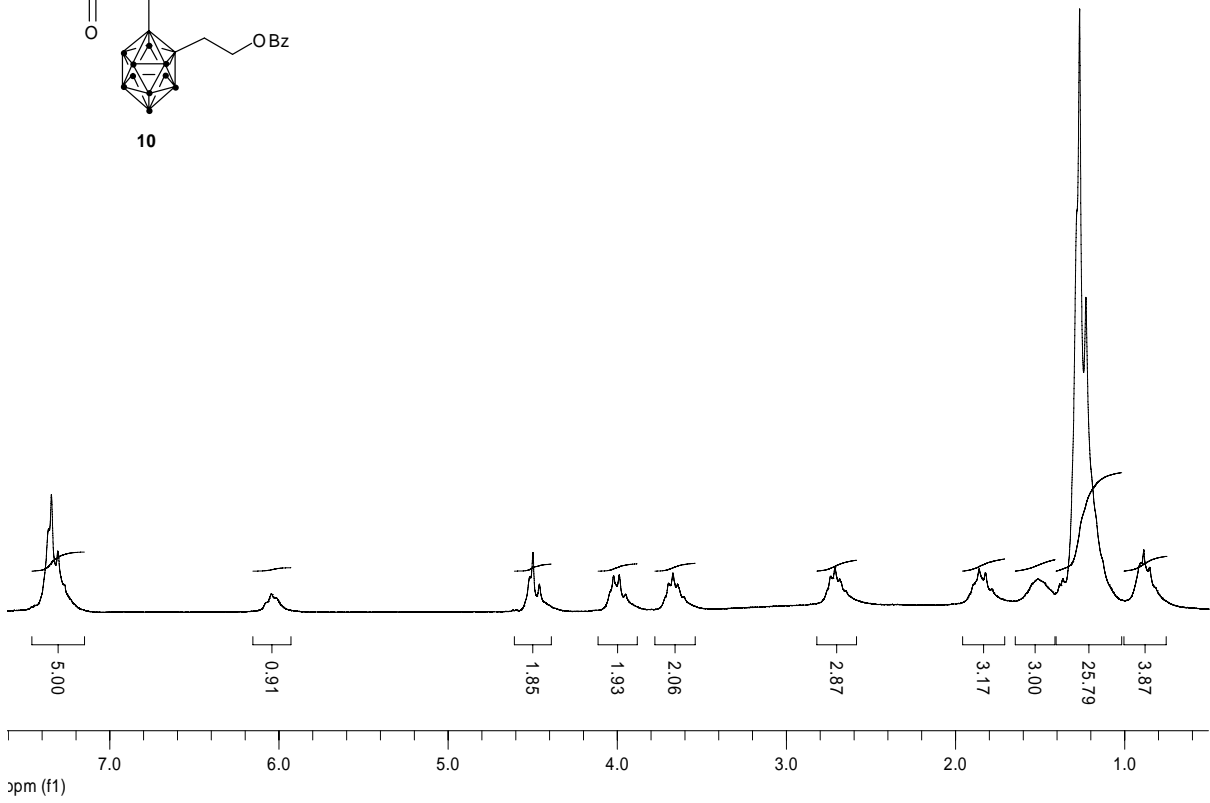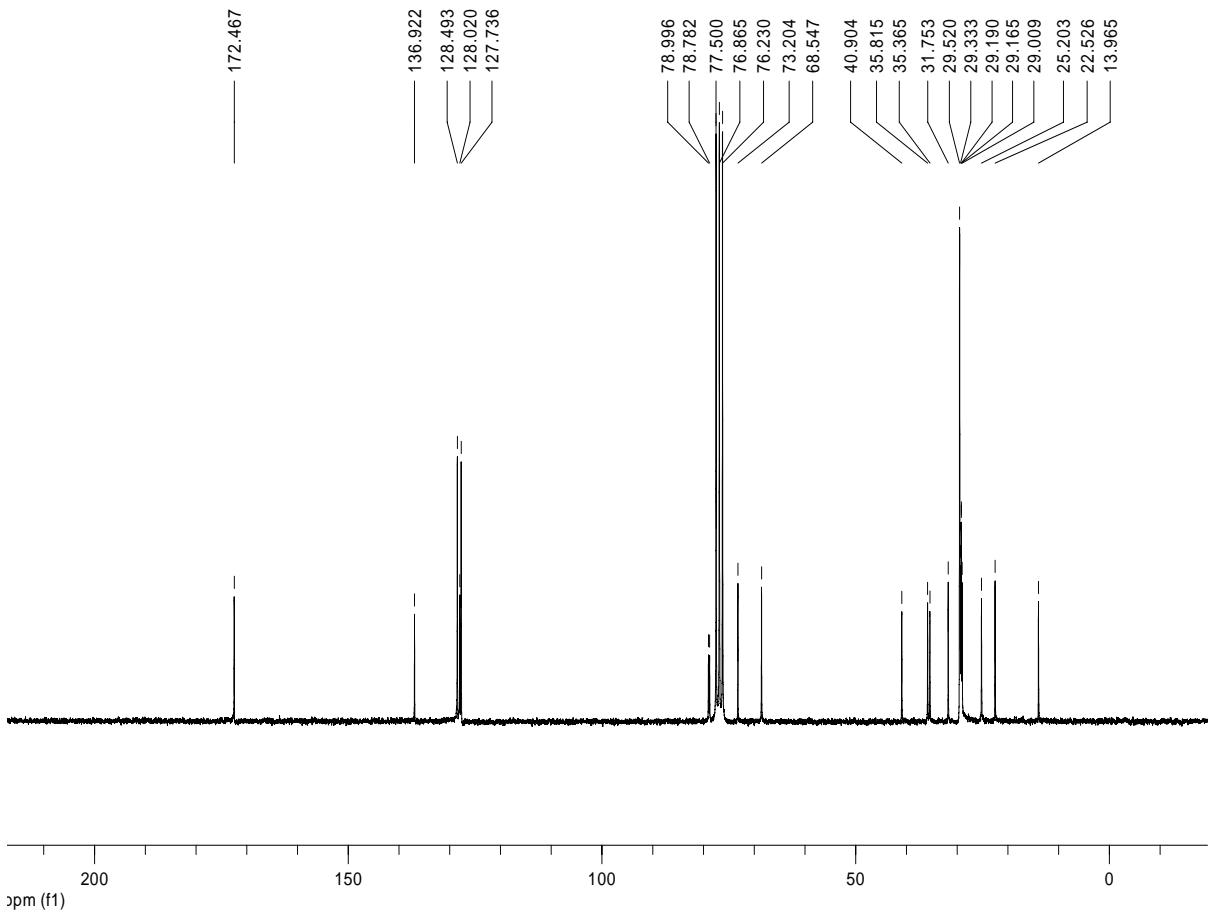



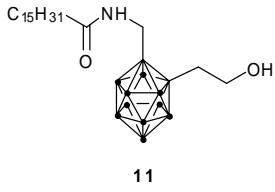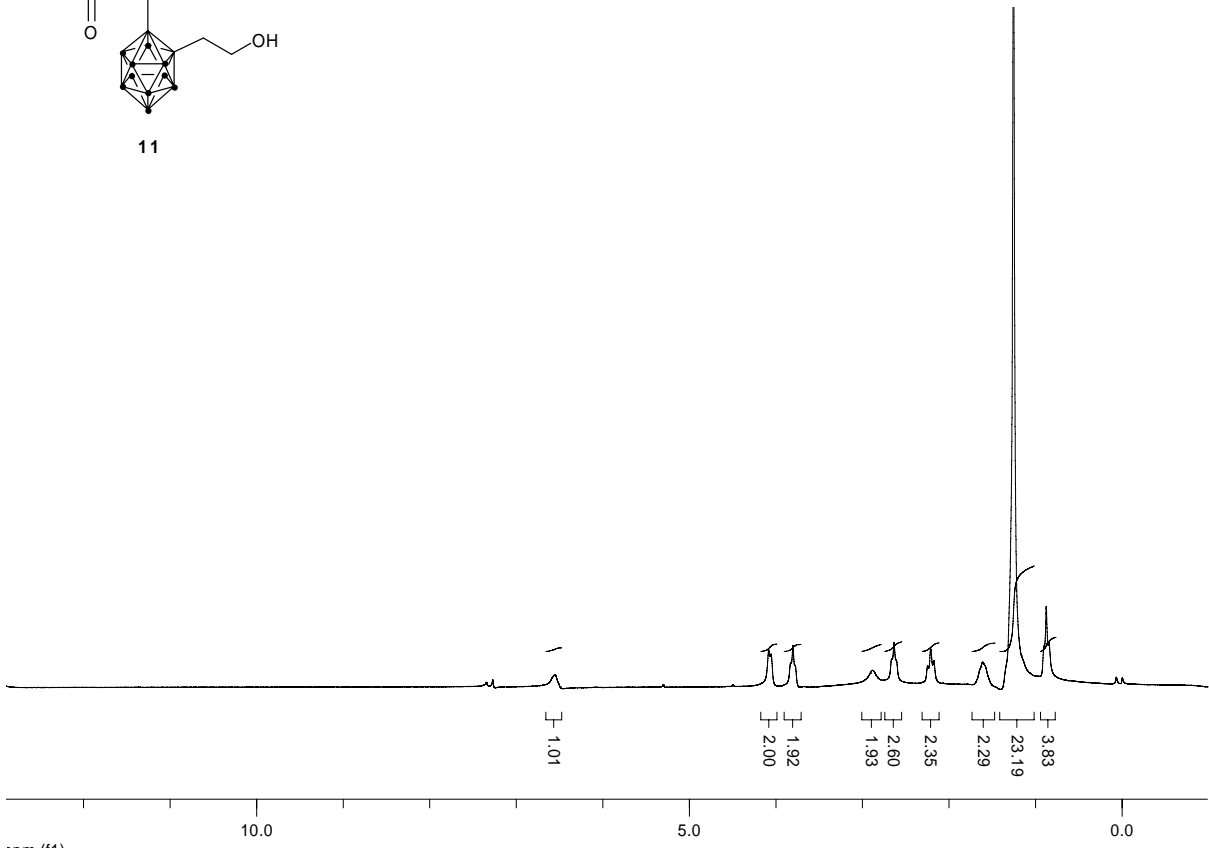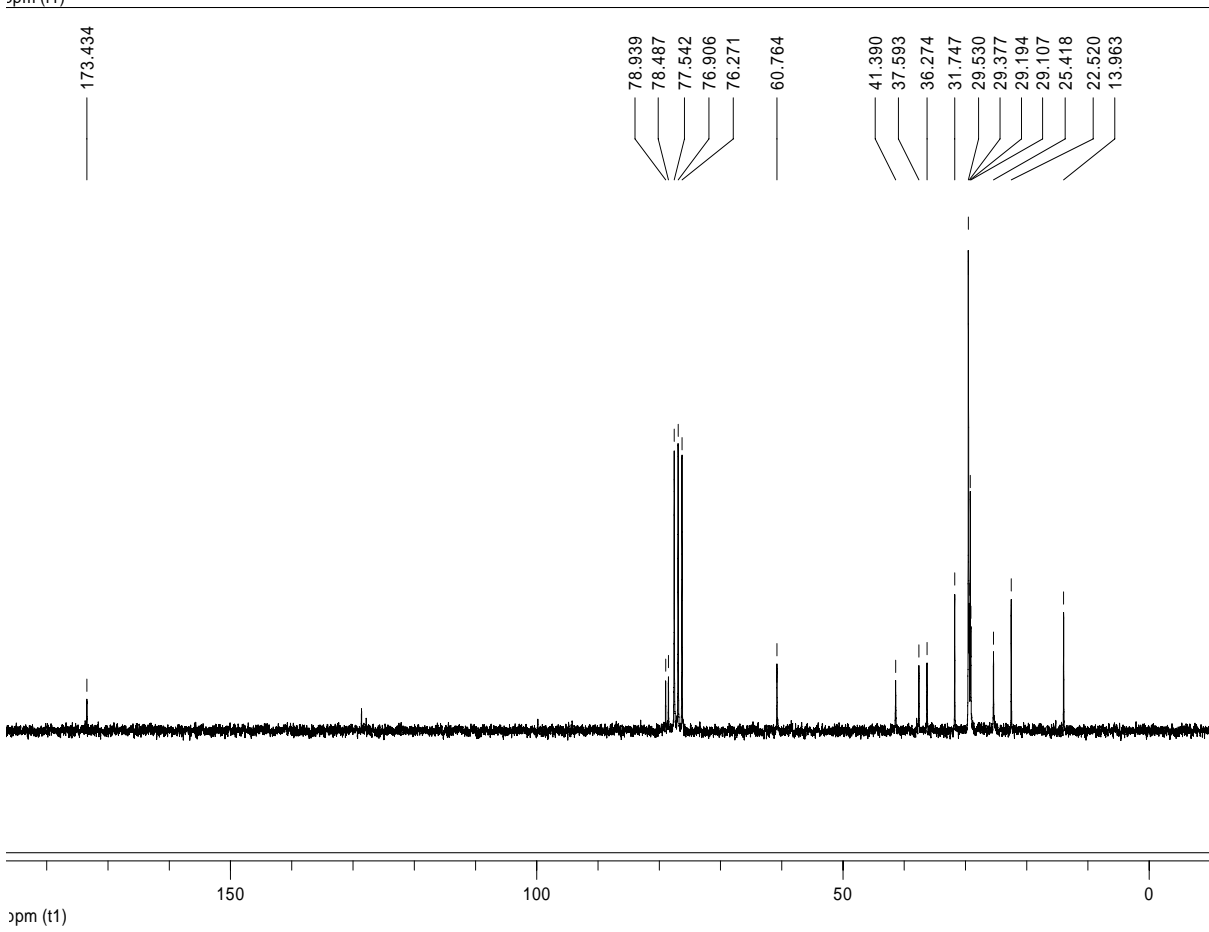

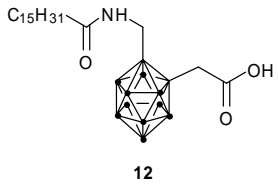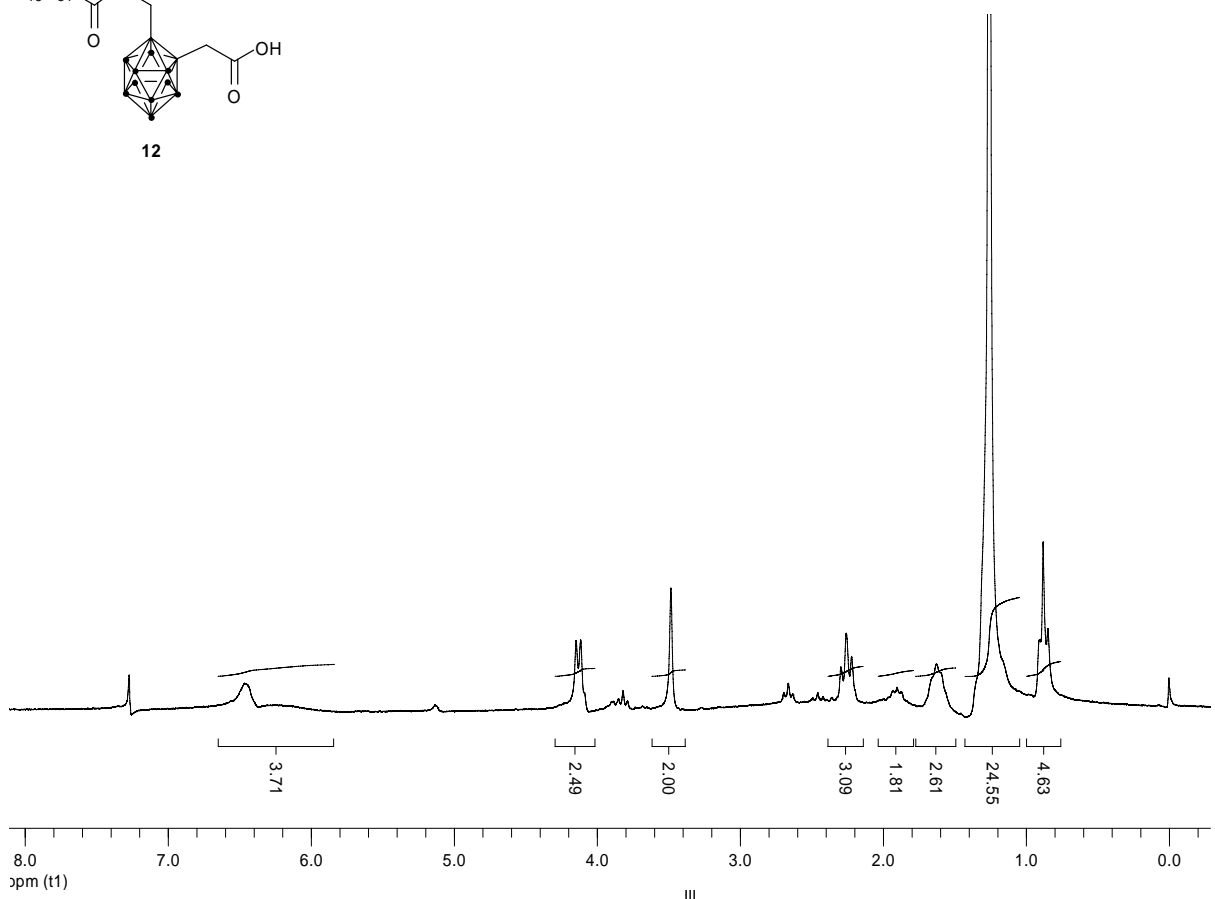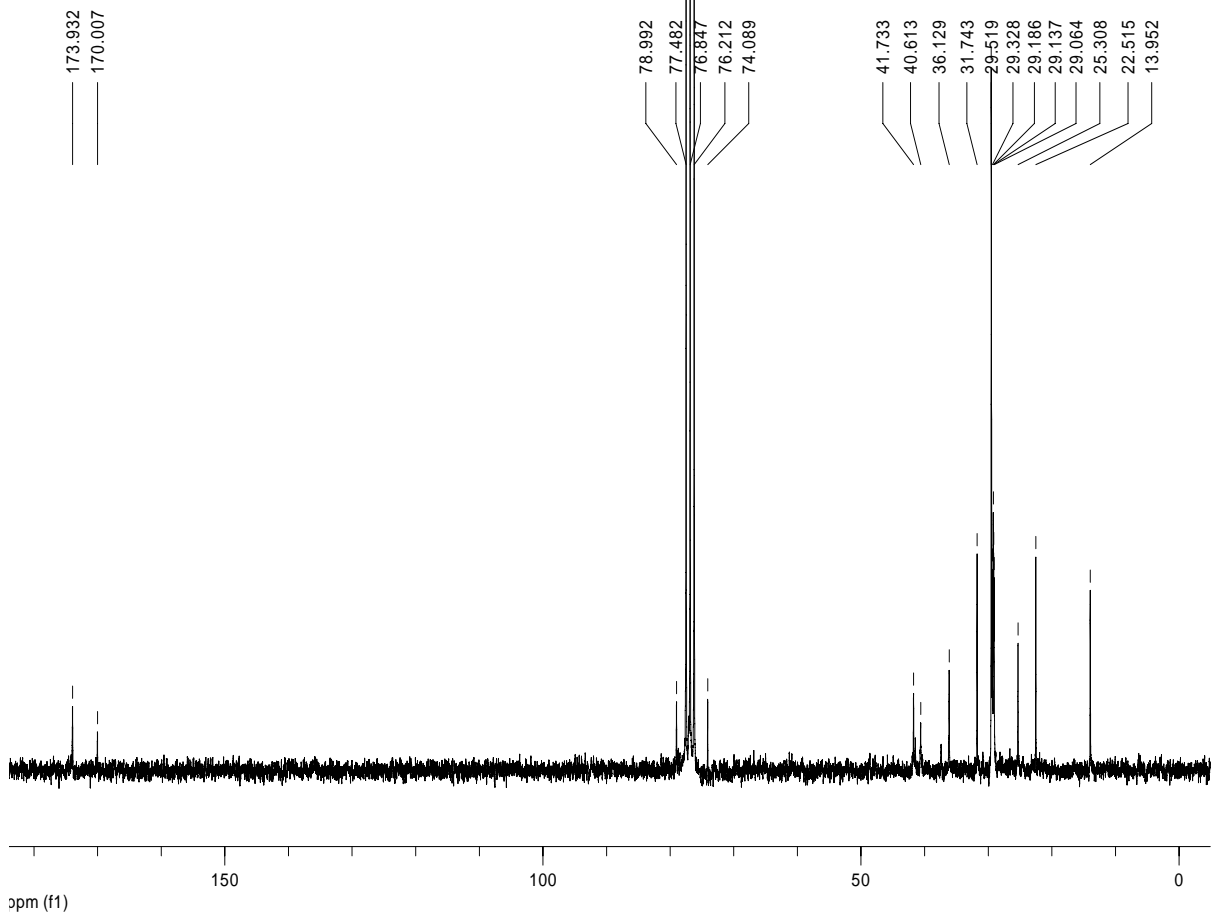

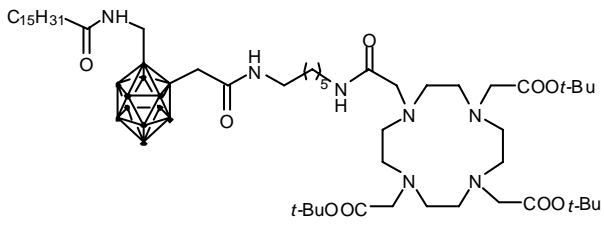

13

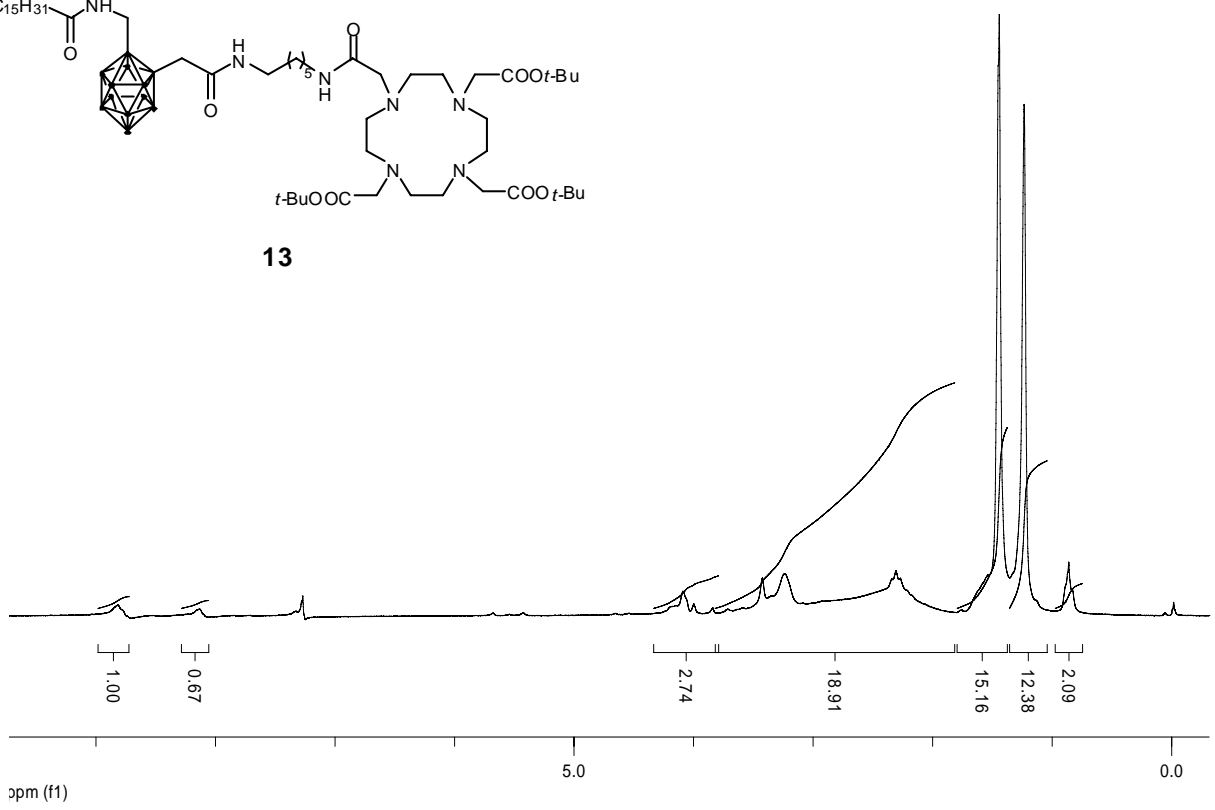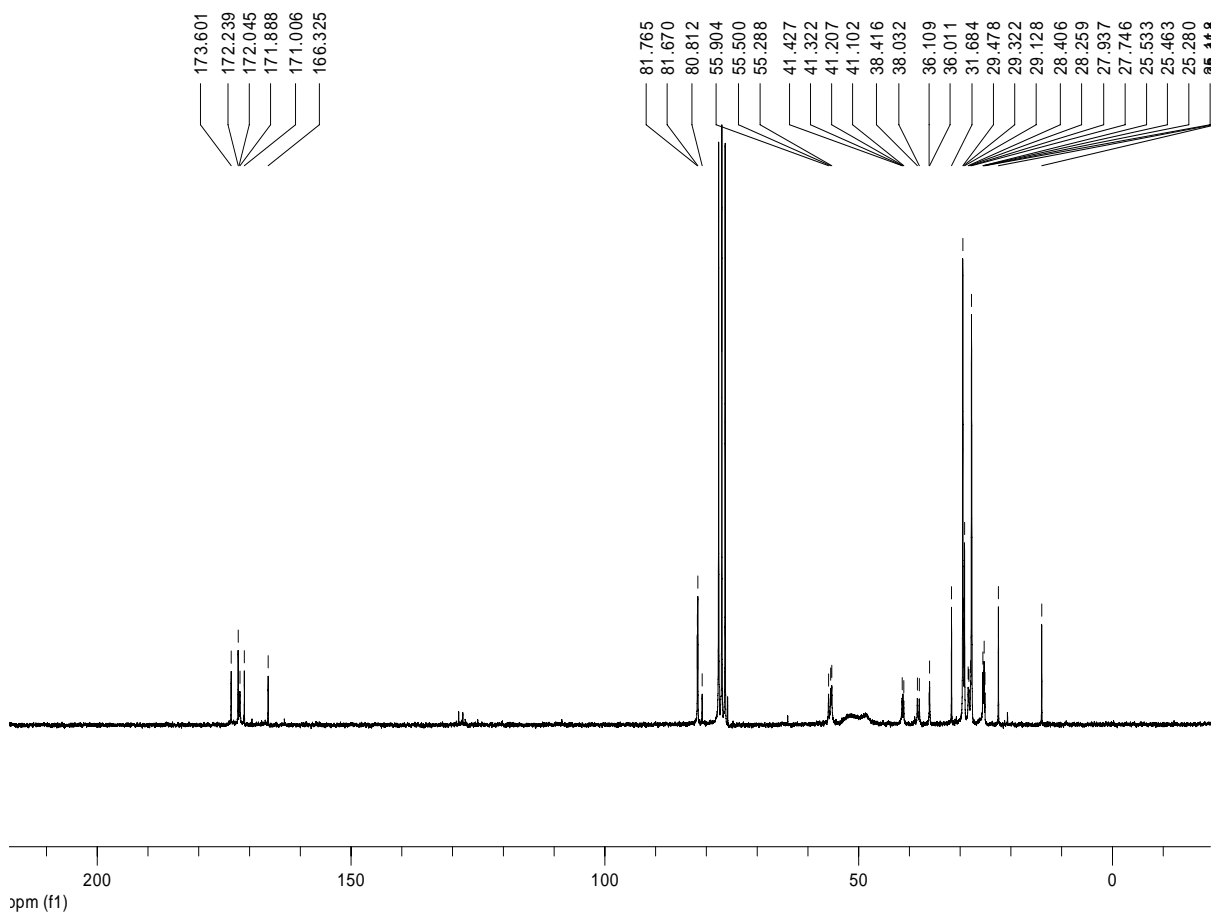

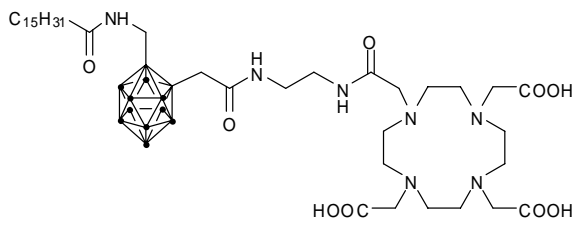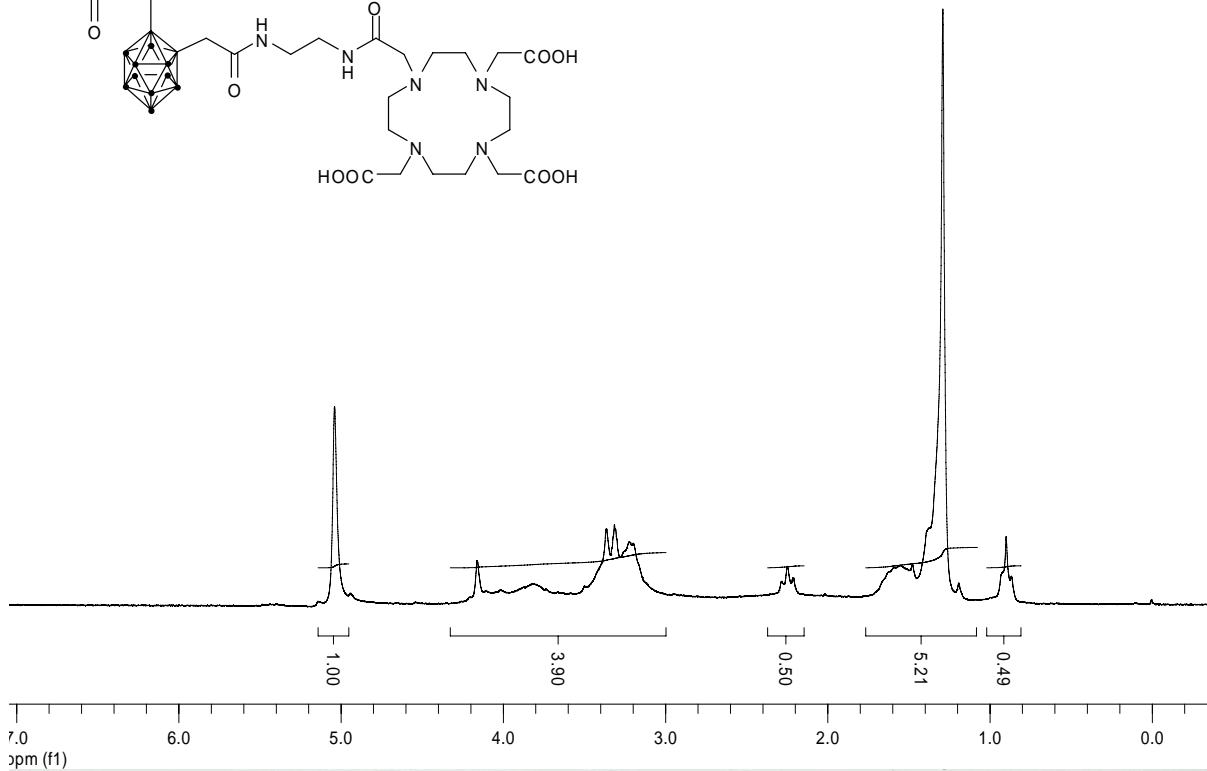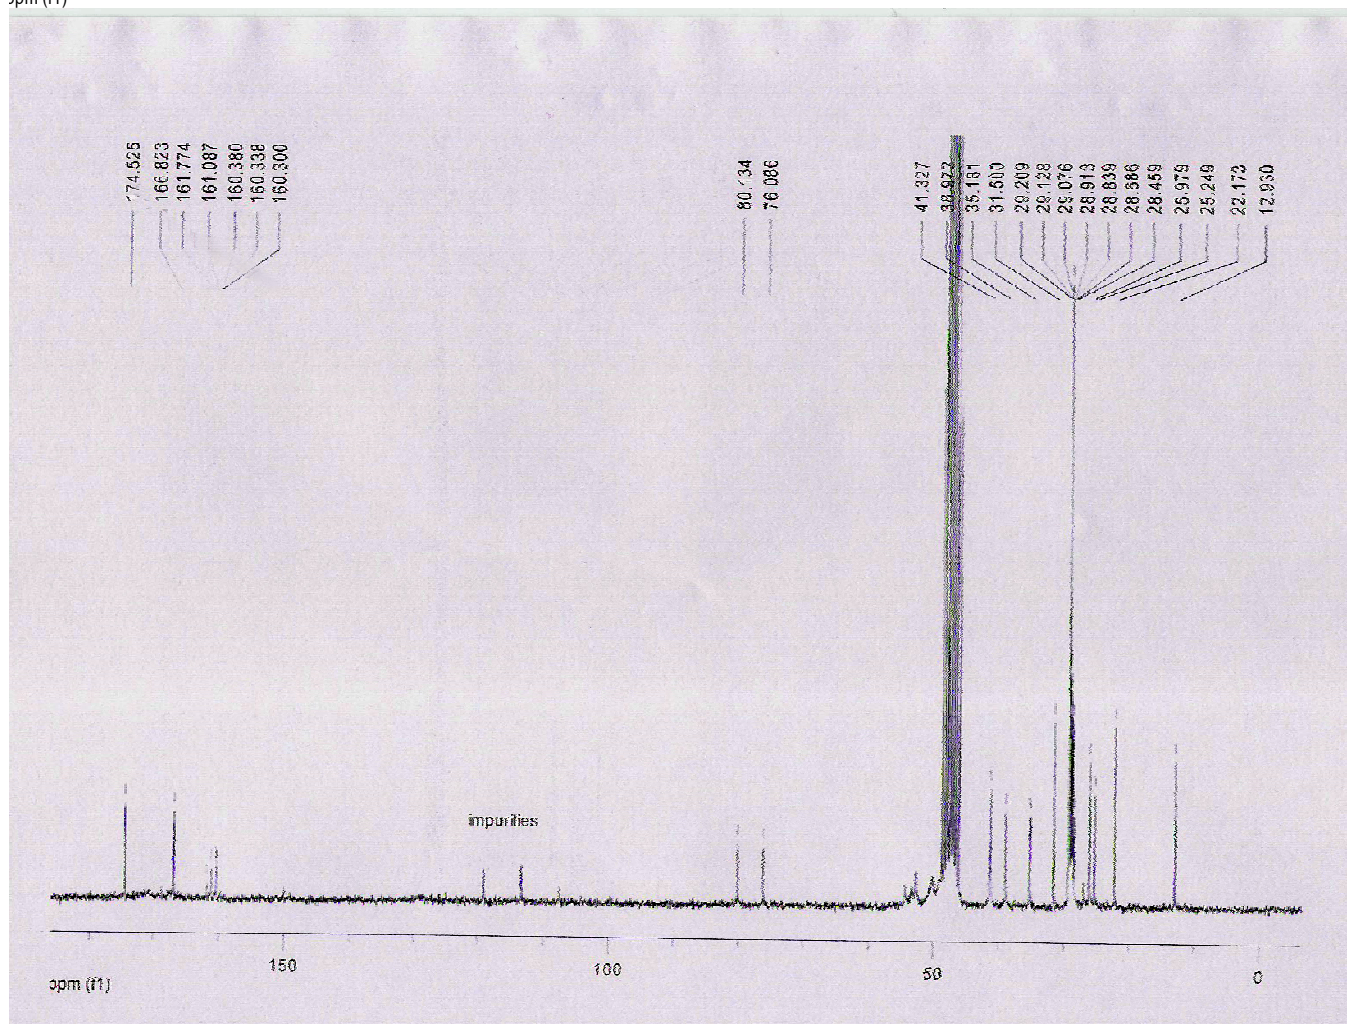

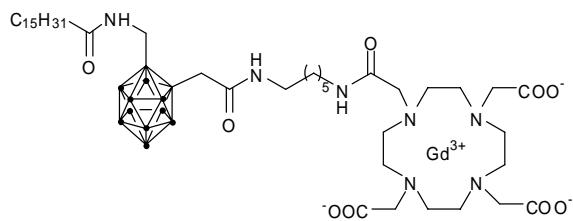

ANTONIO11 14 (0.505) Cu (0.50); Is (1.00,1.00) C43H83B10GdN7O9Na

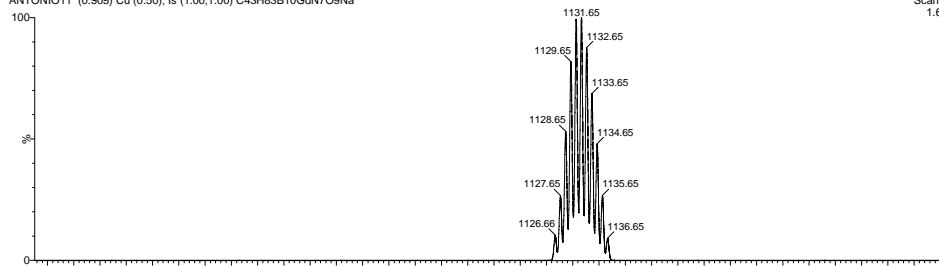

Scan ES+  
1.64e12

ANTONIO11 1 (0.505)

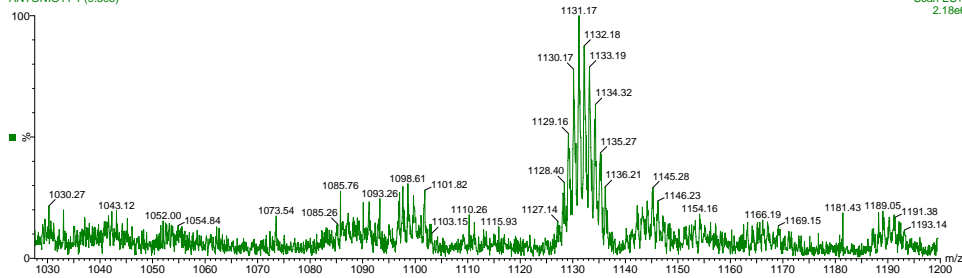

Scan ES+  
2.18e6

Supplement: b808804g.pdf [file b808804g.pdf]
